# Supplementary material
Source: publisher figshare collection journal article supplement (https://tandf.figshare.com/articles/dataset/_/3753612)
Supplement: Supplementary file 1 [file 1]

## Supplementary Material 1

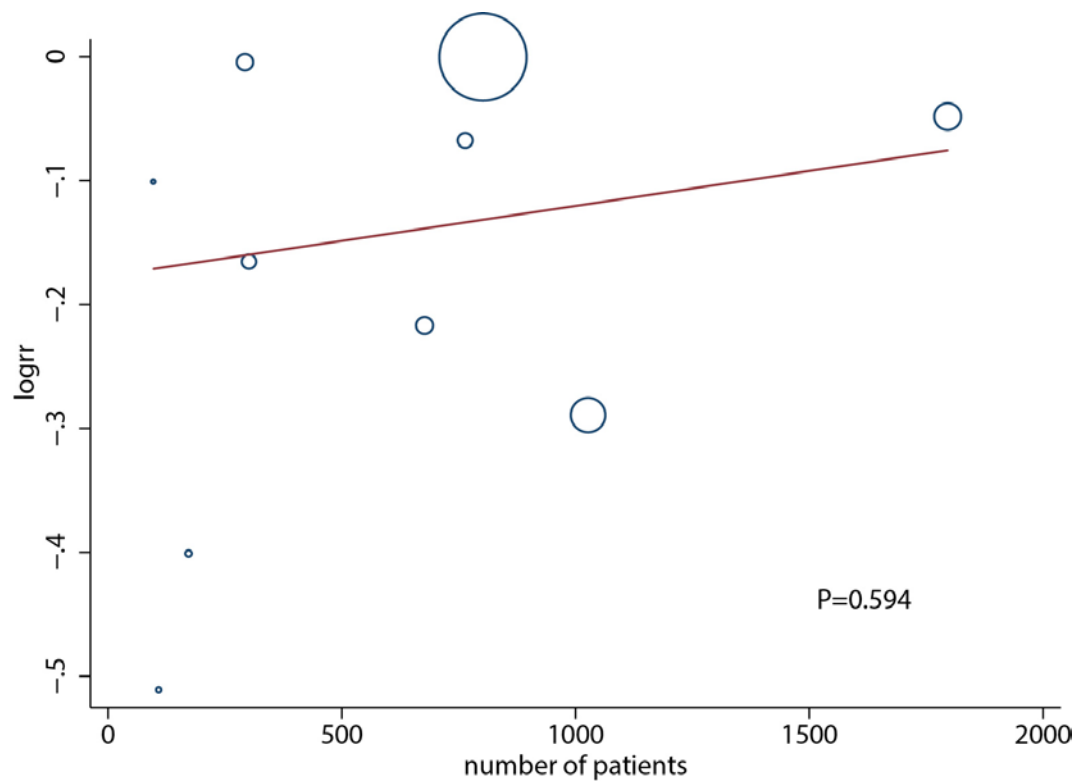

**Figure S1.** Meta-regression on the basis of number patients

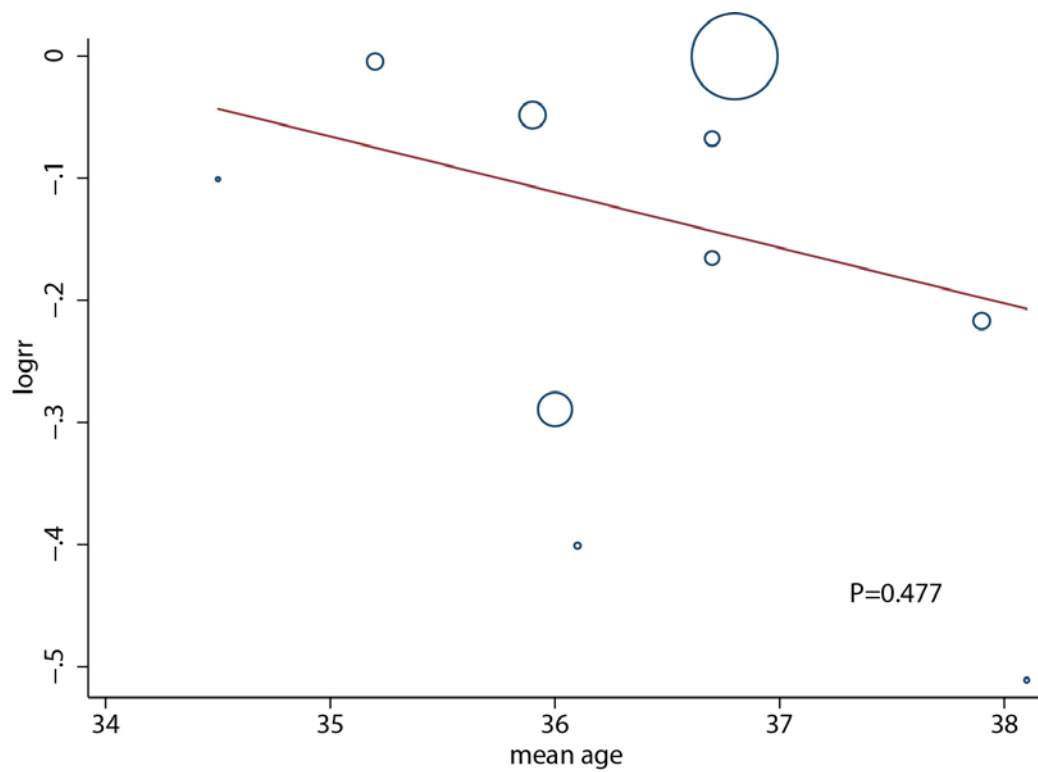

**Figure S2.** Meta-regression on the basis of mean age

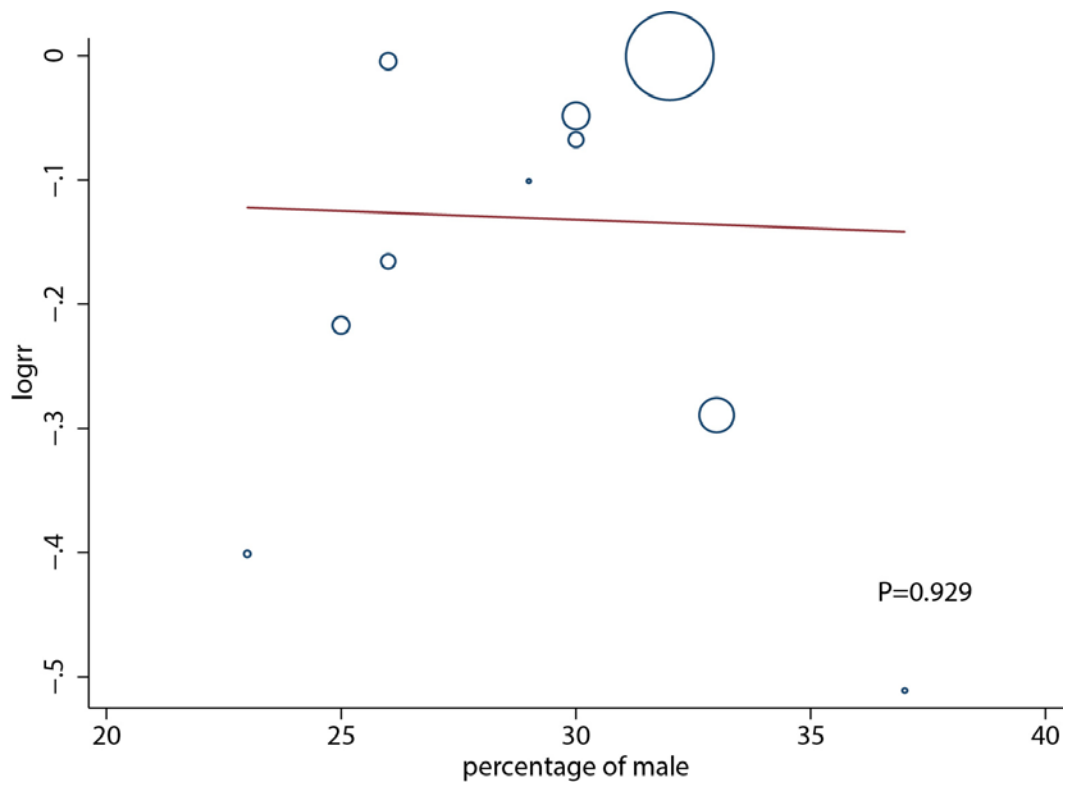

**Figure S3.** Meta-regression on the basis of percentage of male

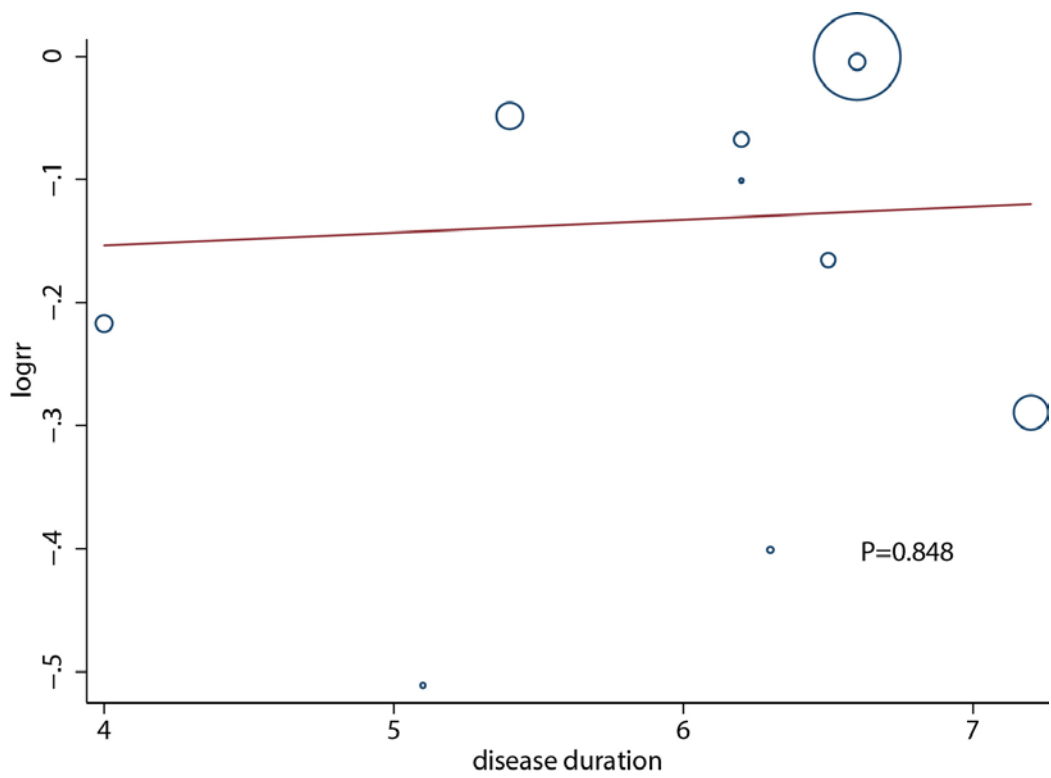

**Figure S4.** Meta-regression on the basis of disease duration

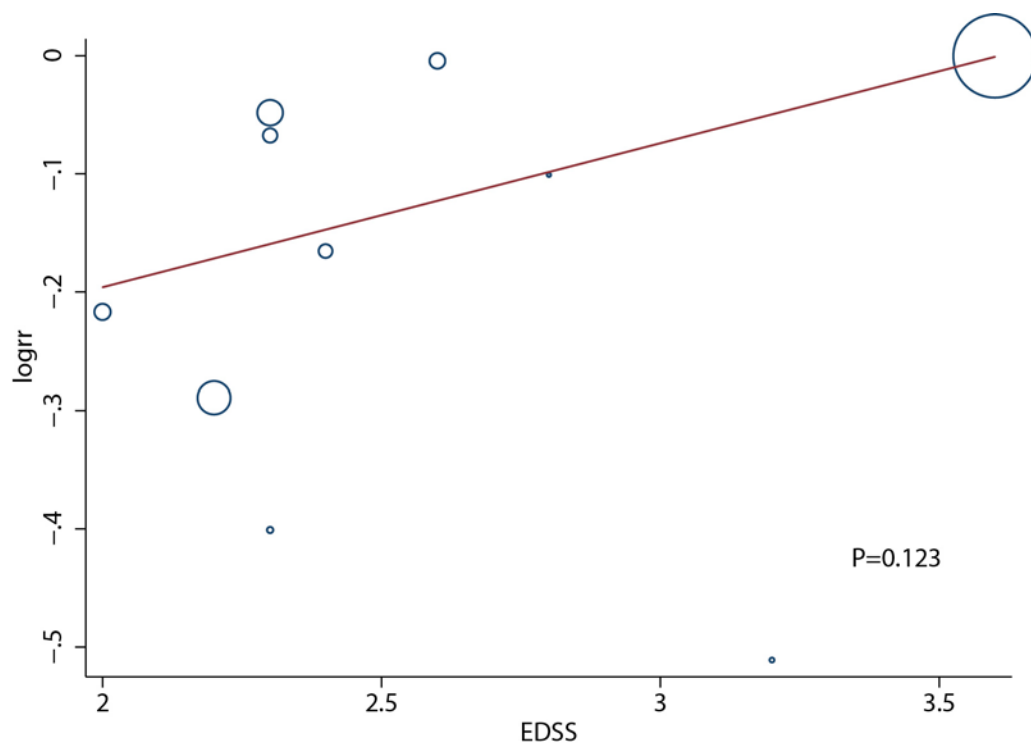

**Figure S5.** Meta-regression on the basis of EDSS

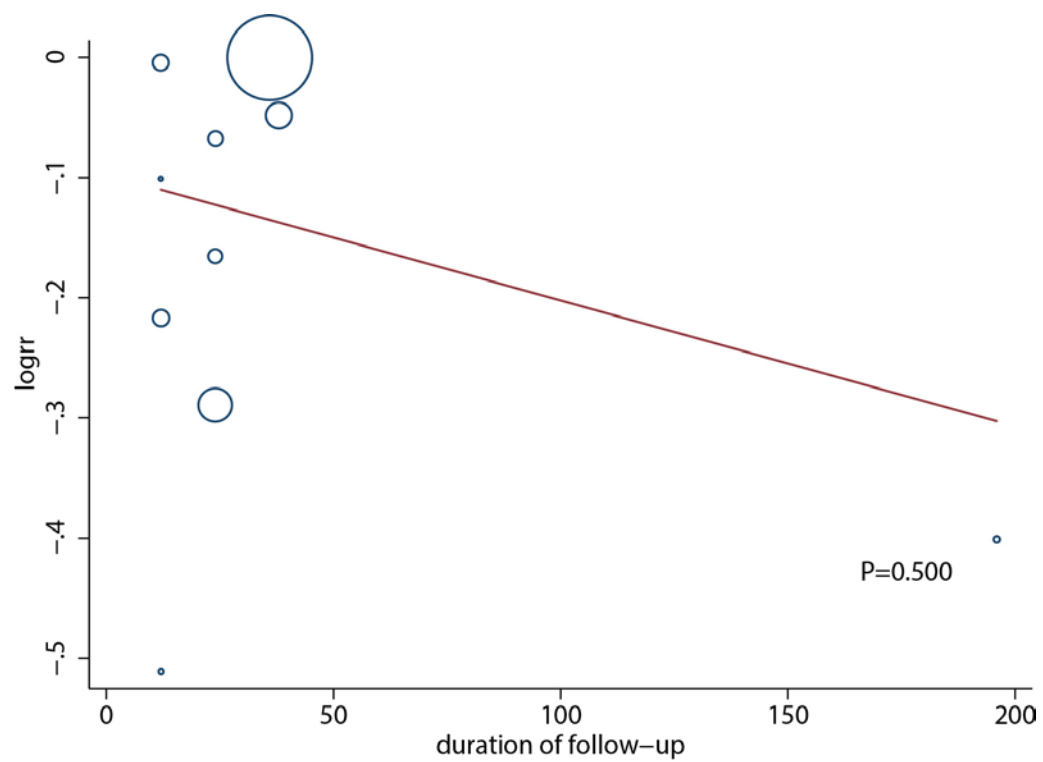

**Figure S6.** Meta-regression on the basis of duration of follow-up

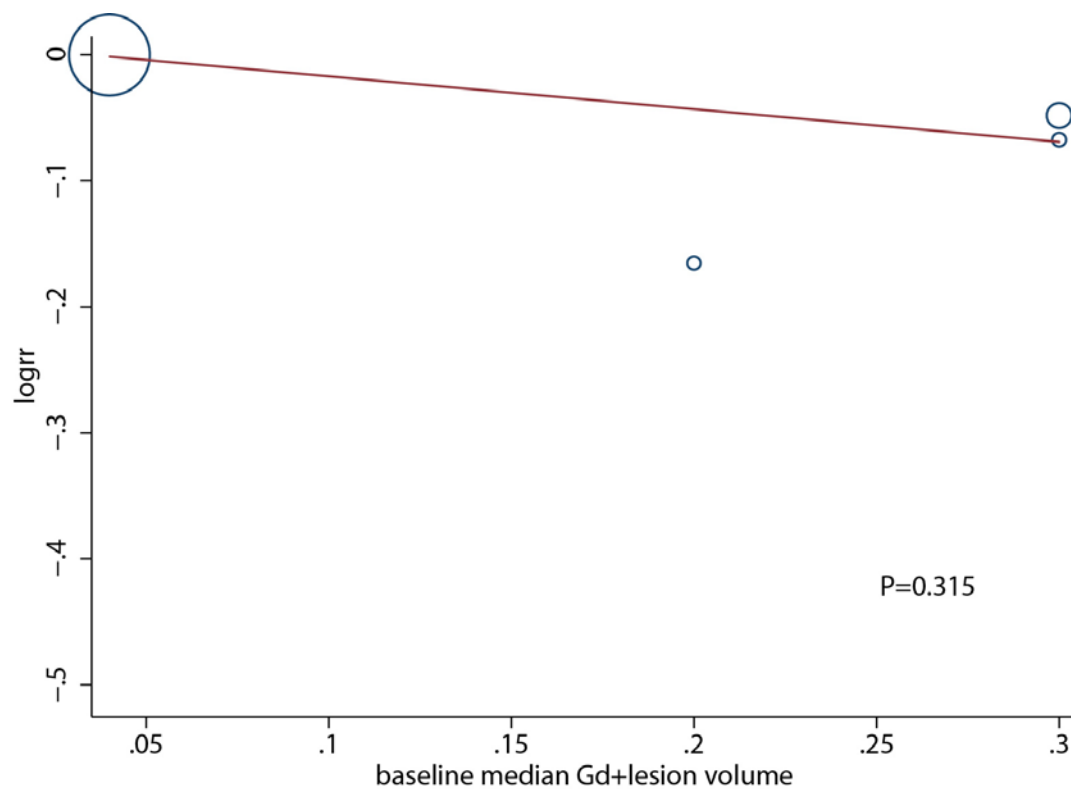

**Figure S7.** Meta-regression on the basis of baseline median Gd+lesion volume

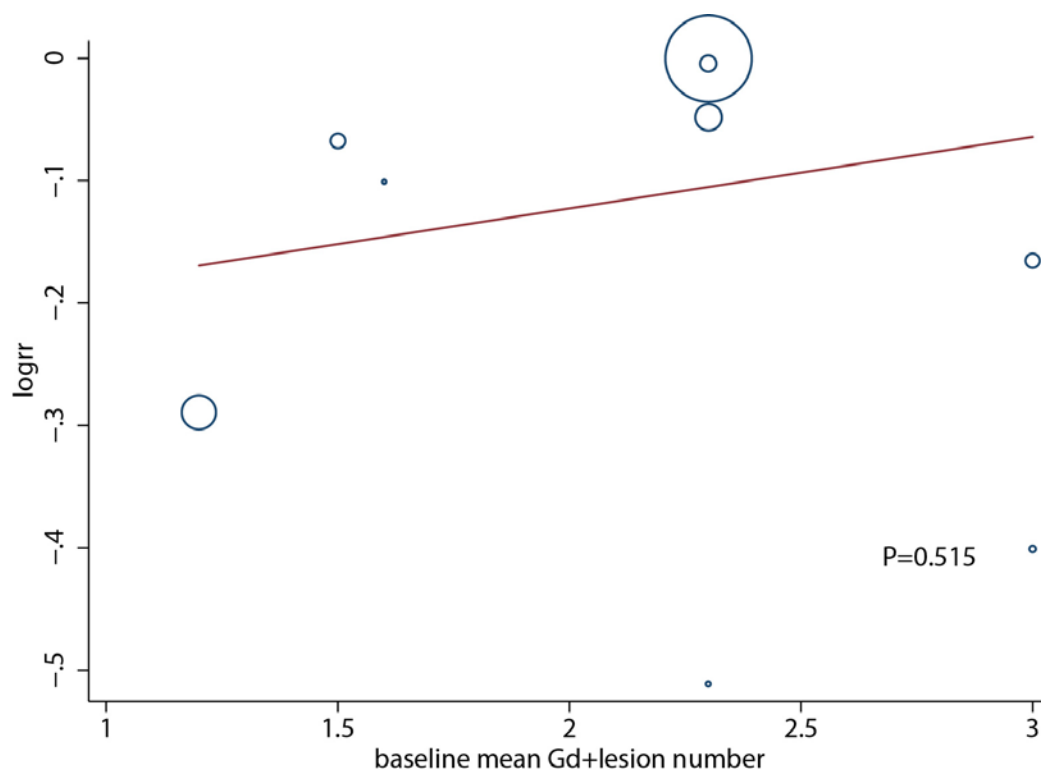

**Figure S8.** Meta-regression on the basis of baseline mean Gd+lesion number

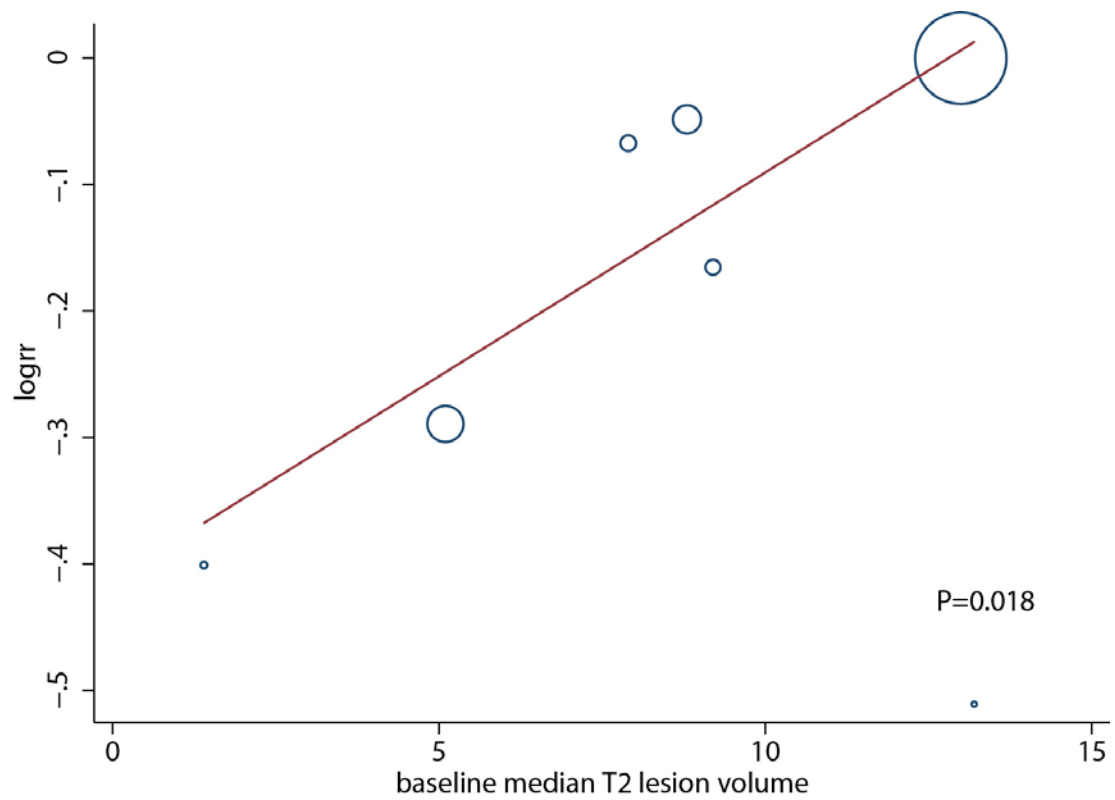

**Figure S9.** Meta-regression on the basis of baseline median T2 lesion volume

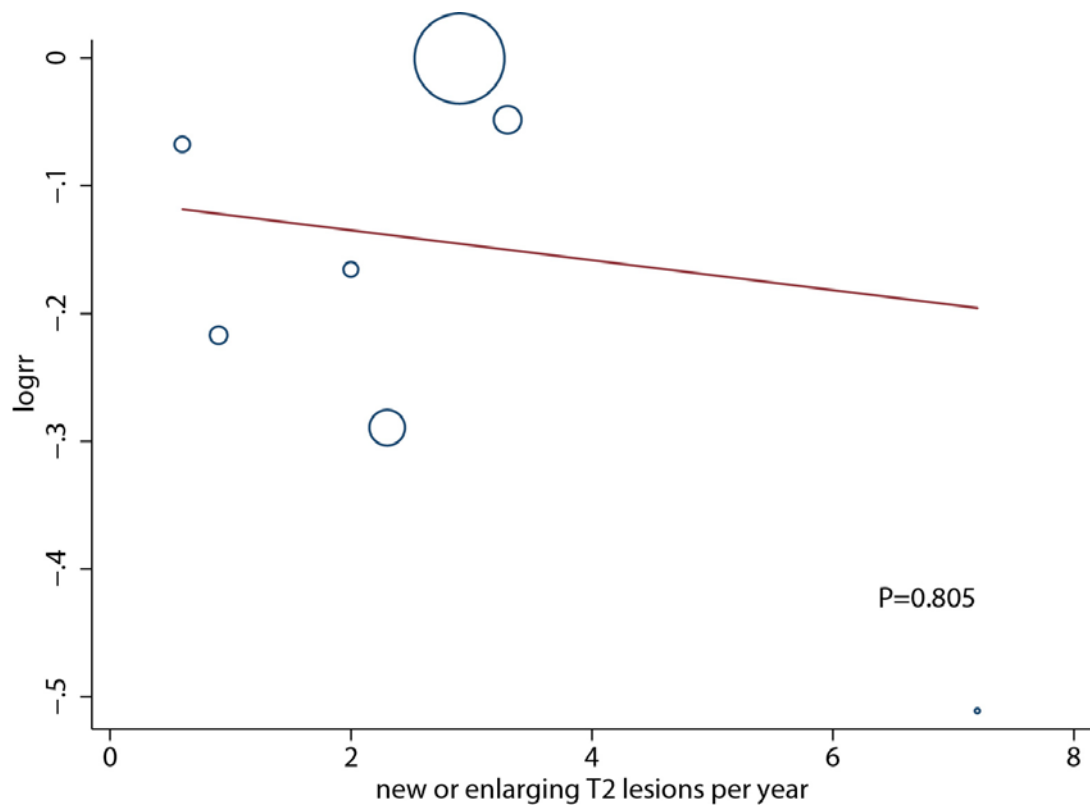

**Figure S10.** Meta-regression on the basis of new or enlarging T2 lesions per year

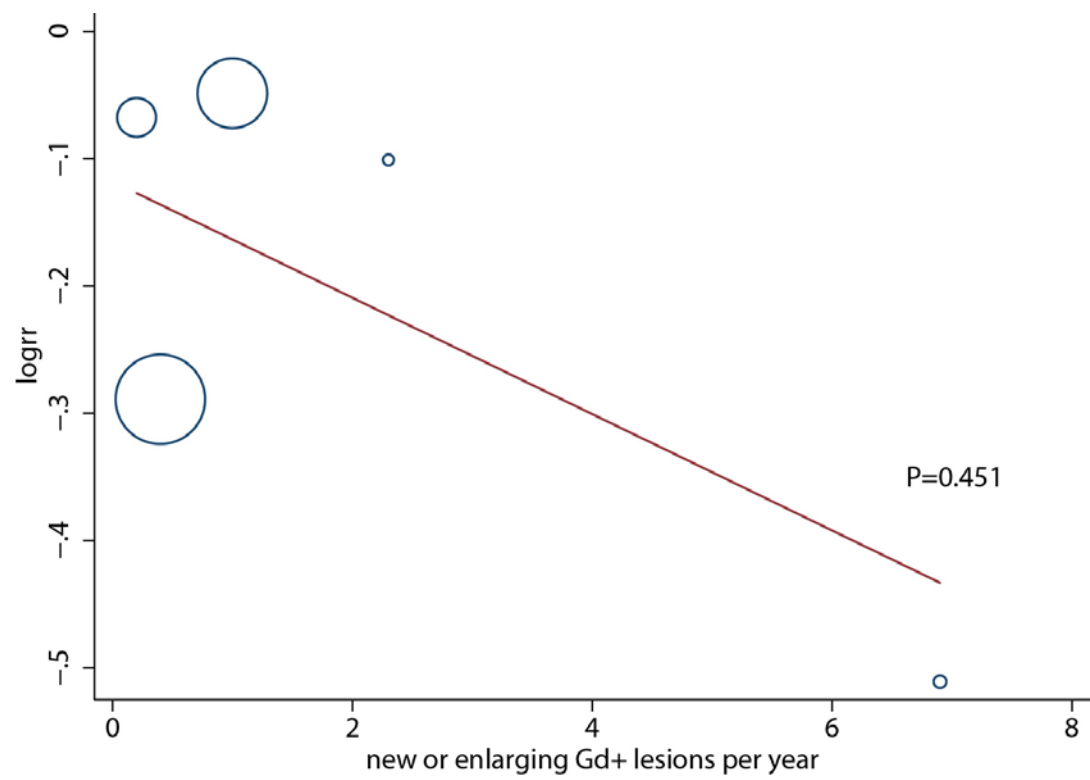

**Figure S11.** Meta-regression on the basis of new or enlarging Gd+ lesions per year
